# Supplementary material
Source: publisher figshare collection journal article supplement (https://acs.figshare.com/ndownloader/files/4190473)
Supplement: Supplementary file 1 [file 4190473]

# Preparation and Fuel Cell Performance of Catalyst Layers Using Sulfonated Polyimide Ionomers

Takuya Omata,<sup>†</sup> Manabu Tanaka,<sup>‡</sup> Kenji Miyatake,<sup>\*,‡,§</sup> Makoto Uchida,<sup>‡</sup> Hiroyuki Uchida,<sup>‡,§</sup>  
and Masahiro Watanabe<sup>\*,‡</sup>

<sup>†</sup>*Interdisciplinary Graduate School of Medicine and Engineering,*

<sup>‡</sup>*Fuel Cell Nanomaterials Center,*

<sup>§</sup>*Clean Energy Research Center, University of Yamanashi,*

*4 Takeda, Kofu 400-8510, Japan*

miyatake@yamanashi.ac.jp (KM), m-watanabe@yamanashi.ac.jp (MW)

# Preparation of Catalyst-Coated Membrane (CCM)

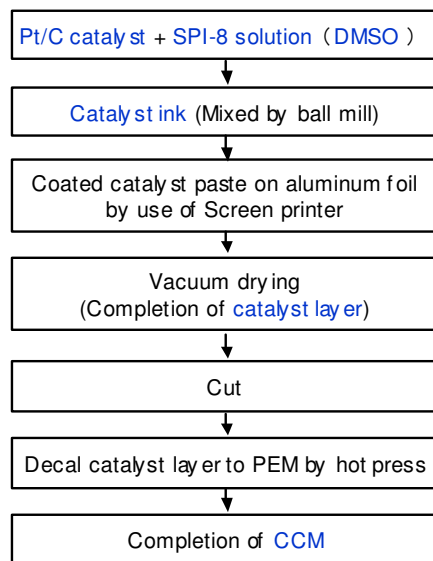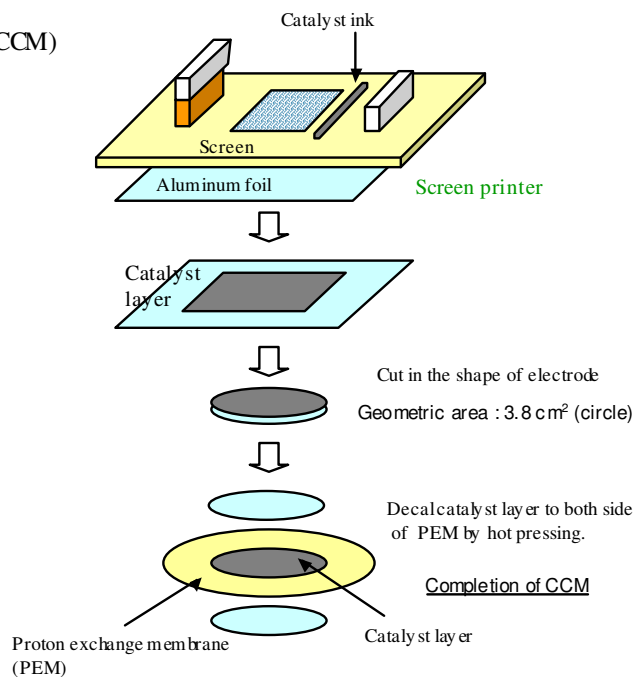

**Figure S1** Preparation procedure of catalyst-coated membrane (CCM) with SPI-8 ionomer as a binder in the catalyst layer.

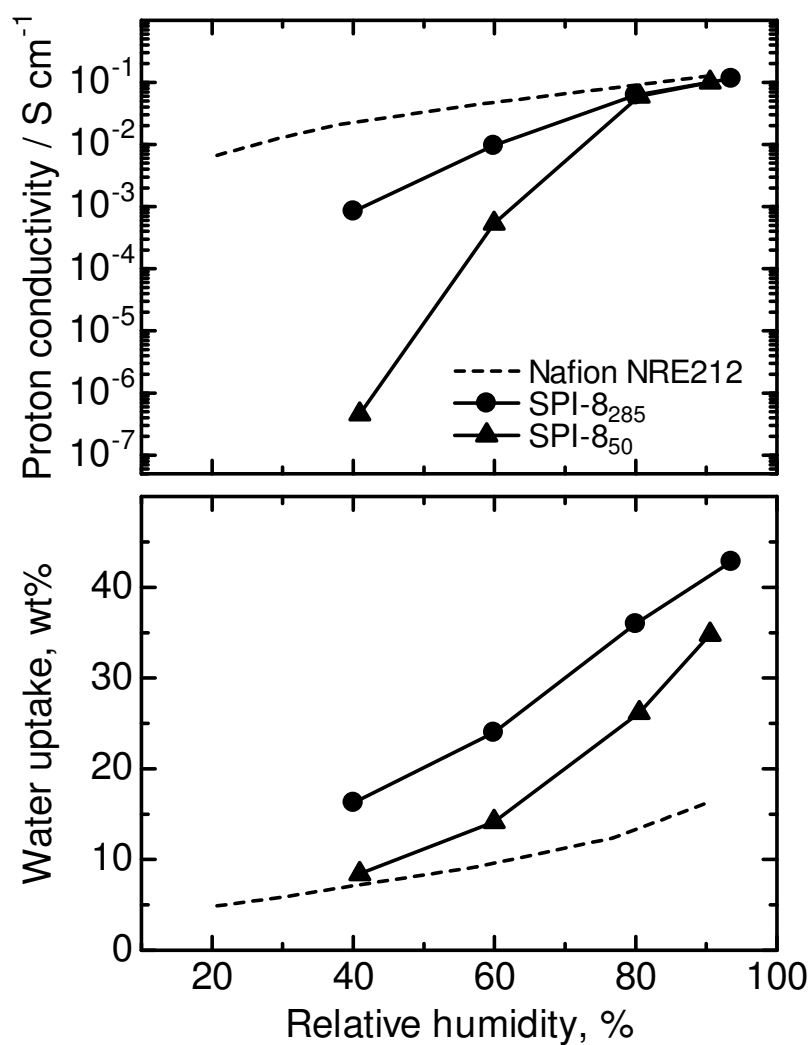

**Figure S2** Humidity dependence of proton conductivity (top) and water uptake (bottom) of SPI-8<sub>50</sub>, SPI-8<sub>285</sub>, and NRE212 membranes at 80 °C.
